# Supplementary material
Source: publisher figshare collection journal article supplement (https://karger.figshare.com/articles/dataset/_/5241466)
Supplement: Supplementary file 1 [file 1 › 000341981_sm_Erratum.pdf]

In the article by Chang et al.: Functional Recovery of Human Cells Harboring the Mitochondrial DNA Mutation MERRF A8344G via Peptide-Mediated Mitochondrial Delivery. *Neurosignals* (DOI: 10.1159/000341981), the correct name of the fourth author should read Shou-Jen Kuo.

Furthermore, in the section *Mitochondrial Isolation and Delivery* the ratio of Pep-1 to mitochondria should correctly be given as 1.750:1 (not 1,750:1).
